# Supplementary material for: Integrating Multi-Sensors Data for Species Distribution Mapping Using Deep Learning and Envelope Models
Source: MDPI journal article supplement (doi:10.3390/rs13163284), 2021-08-19
Supplement: s1 [file s1]

Archive with 1 entries (1 files):
- remotesensing-1270286-supplementary.pdf
